# Supplementary material
Source: PubMed Central journal article supplement (PMC7119533)

**A)** Lungs (5 000 TCID<sub>50</sub>/mL)

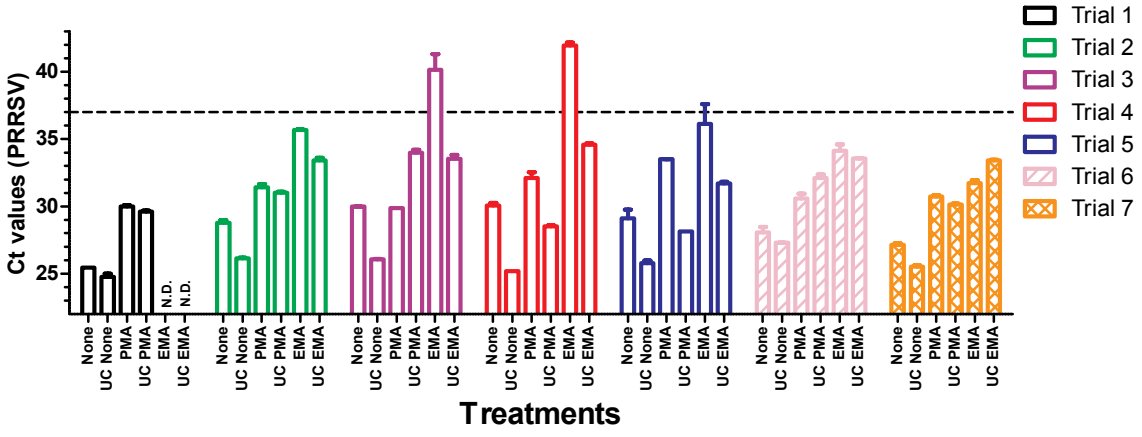

**B)** Lungs (5 000 TCID<sub>50</sub>/mL)

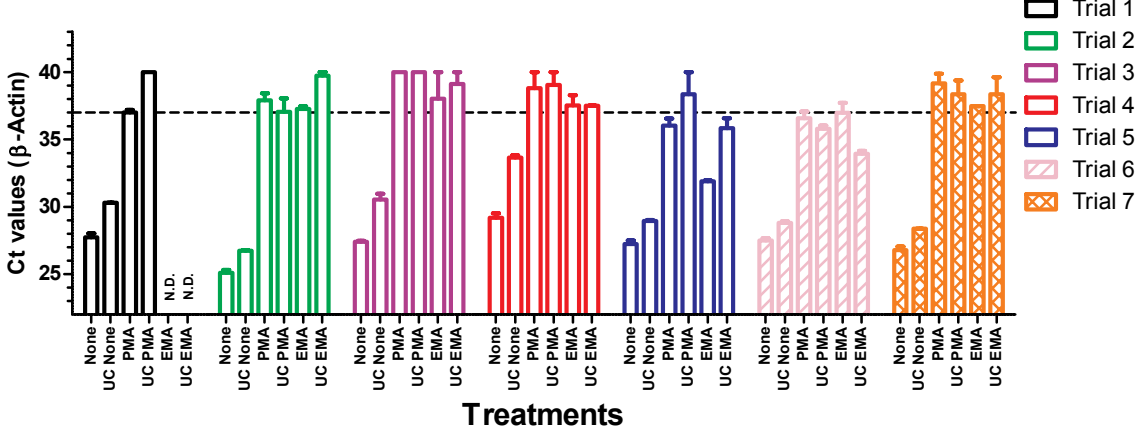

**C)** Lungs (50 000 TCID<sub>50</sub>/mL)

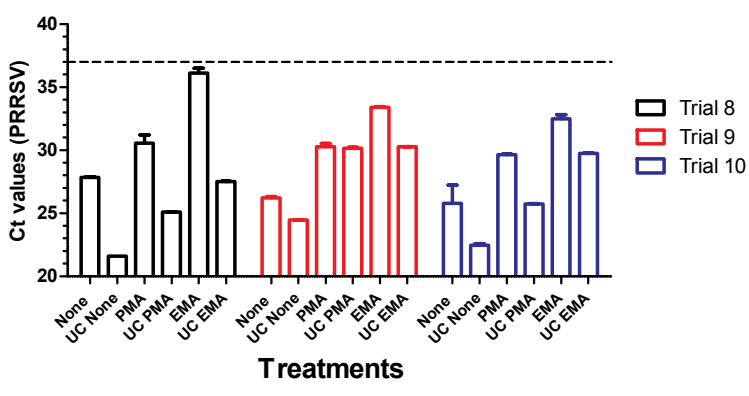

**D)** Lungs (50 000 TCID<sub>50</sub>/mL)

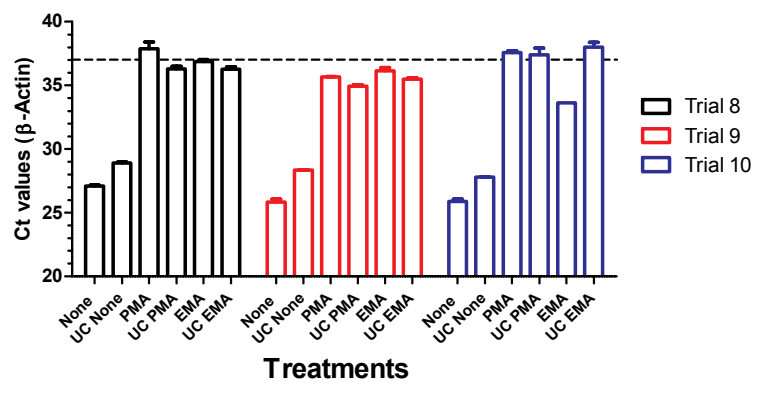

**E)** Sera (5 000 TCID<sub>50</sub>/mL)

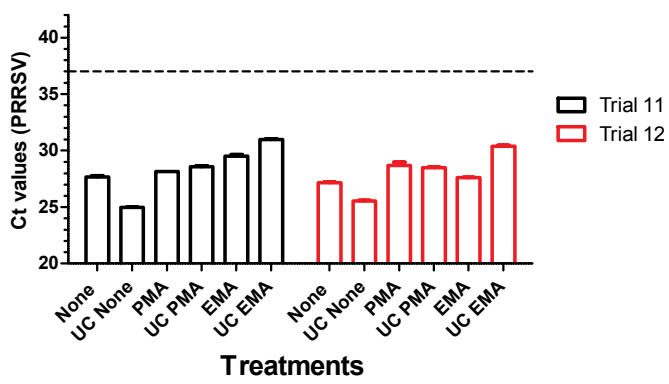

**F)** Sera (5 000 TCID<sub>50</sub>/mL)

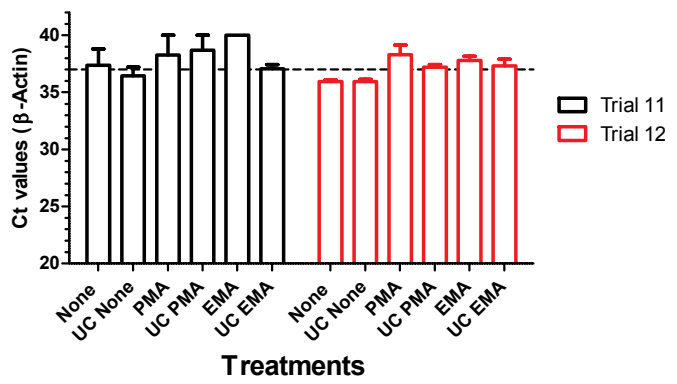

Supplement: mmc1.pdf [file mmc1.pdf]
