# Supplementary material
Source: PubMed Central journal article supplement (PMC7119533)

A)

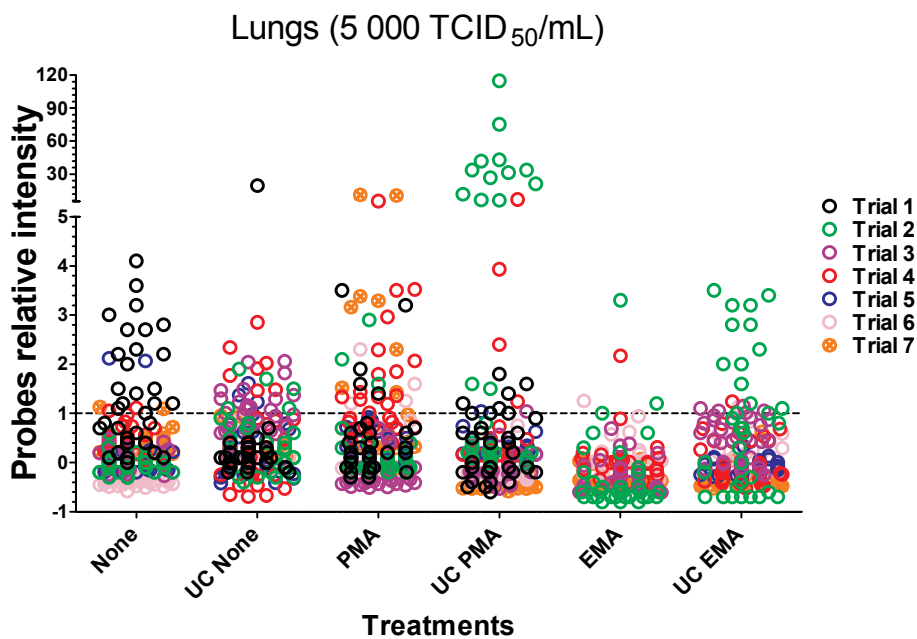

B)

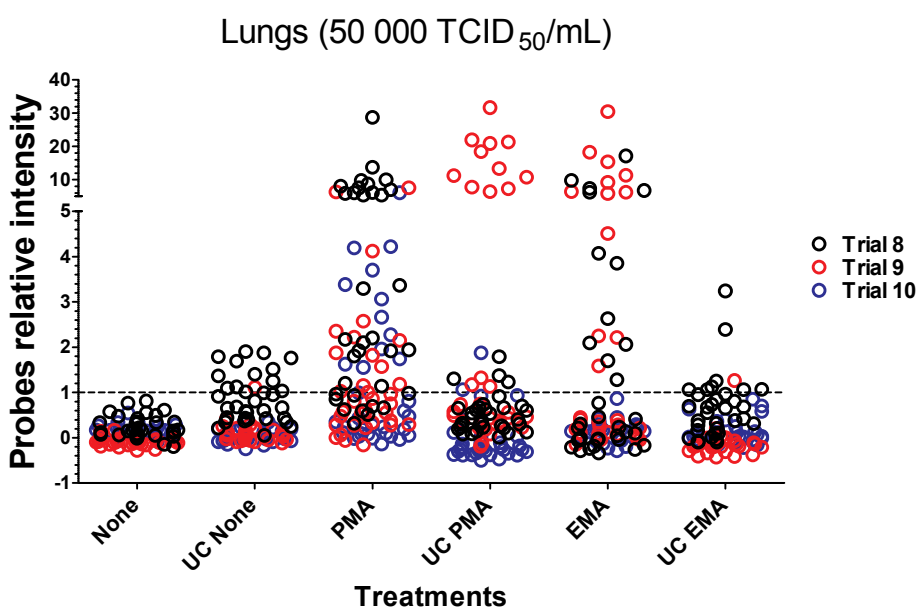

C)

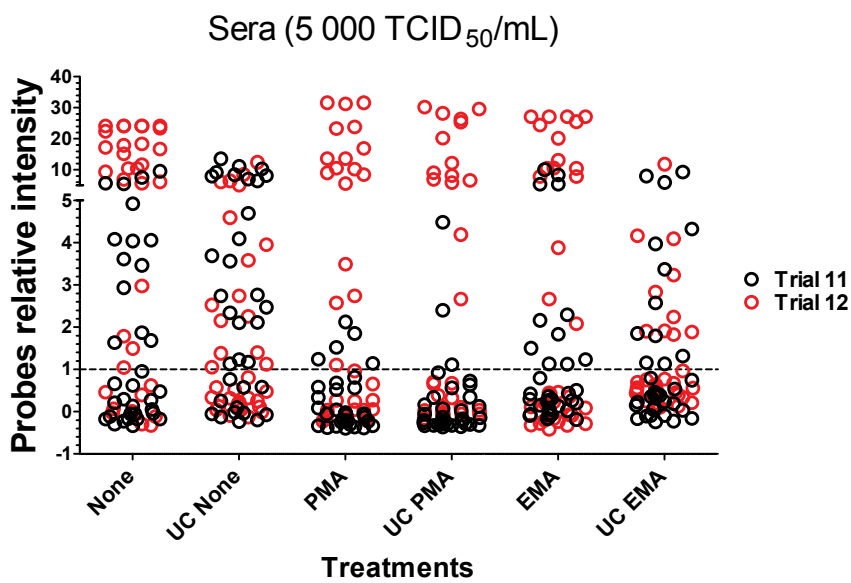

Supplement: mmc2.pdf [file mmc2.pdf]
